# Supplementary material
Source: PubMed Central journal article supplement (PMC3145211)

# Supplemental Figure 1

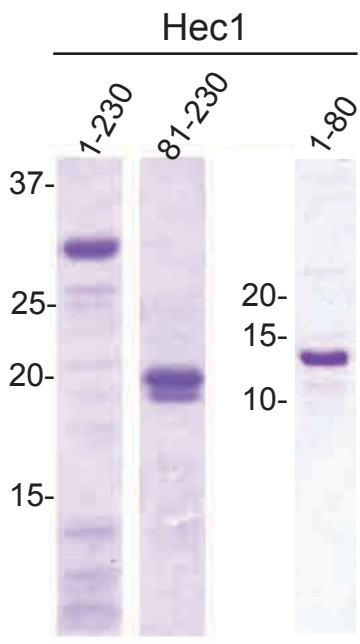

Supplement: NIHMS132716-supplement-sup_figure_1.pdf [file NIHMS132716-supplement-sup_figure_1.pdf]

# Supplemental Figure 2

**A**

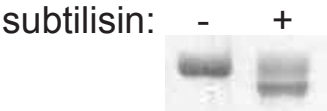

**B**

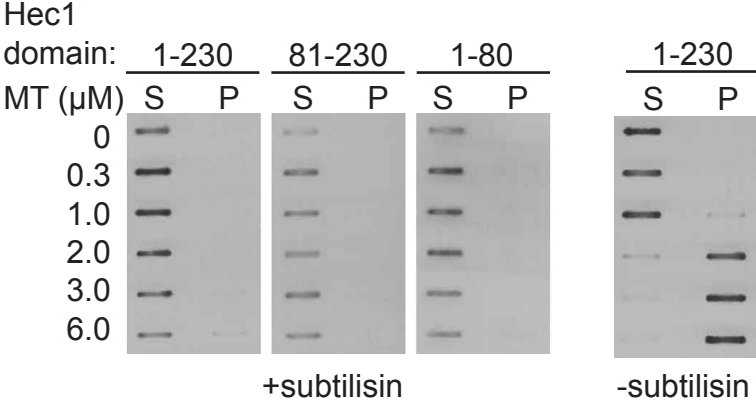

**C**

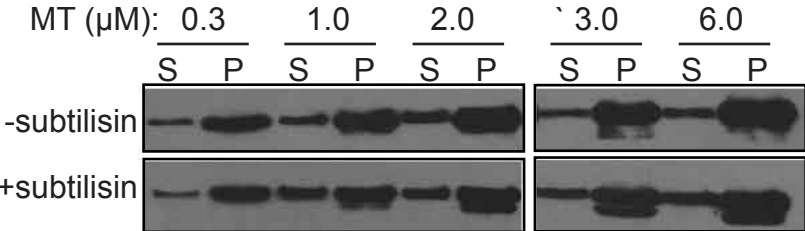

Supplement: NIHMS132716-supplement-sup_fiugre_2.pdf [file NIHMS132716-supplement-sup_fiugre_2.pdf]
